# Supplementary material for: Contribution of HIF-1α/BNIP3-mediated autophagy to lipid accumulation during irinotecan-induced liver injury
Source: PubMed Central journal article supplement (PMC10121580; doi:10.1038/s41598-023-33848-y), 2023-04-21

Figure 1F:

SREBP-1c

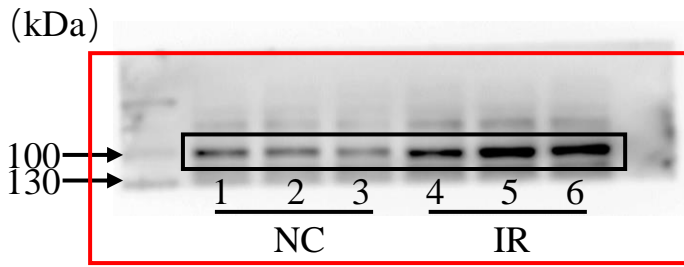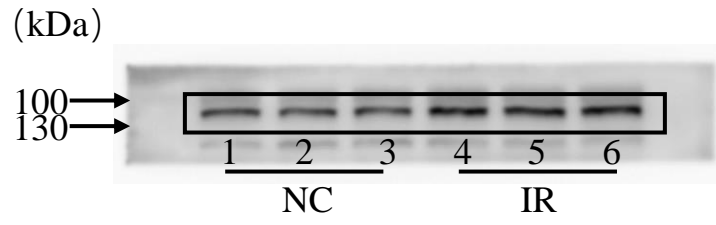

$\beta$ -actin

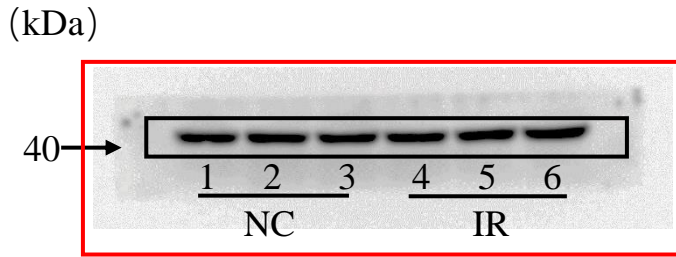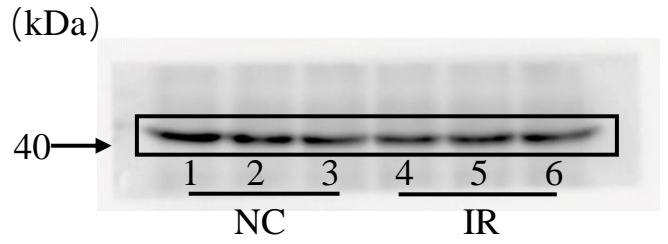

Figure 2A:

LC3

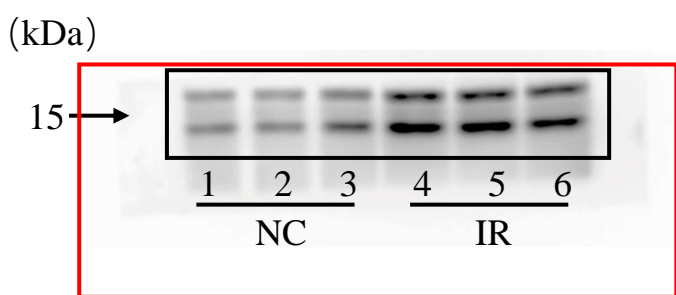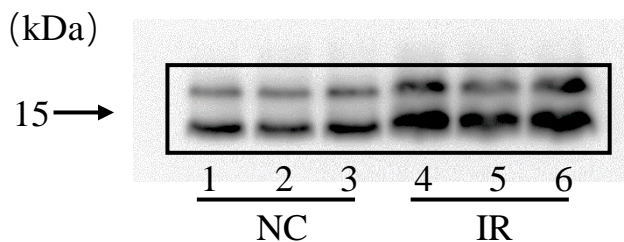

Beclin1

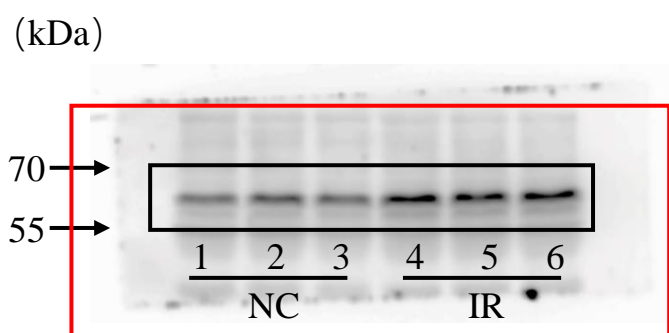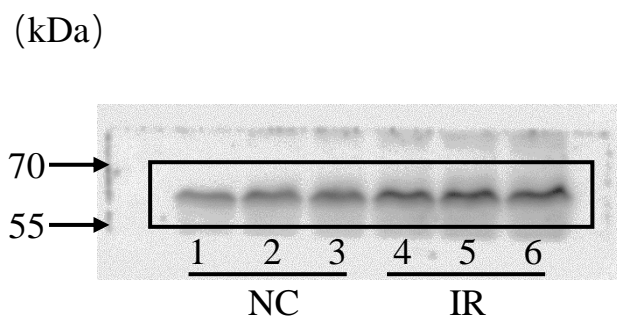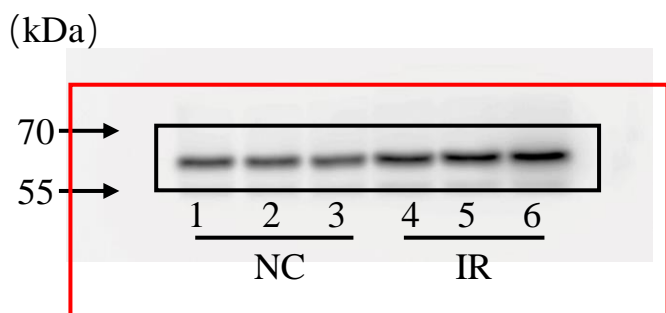

p62

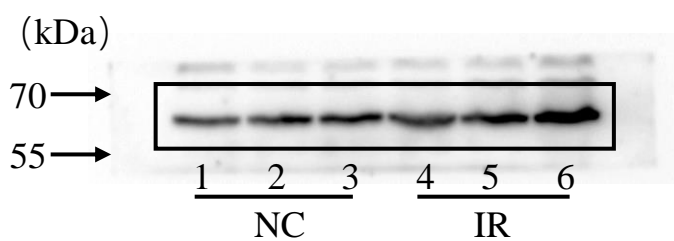

$\beta$ -actin

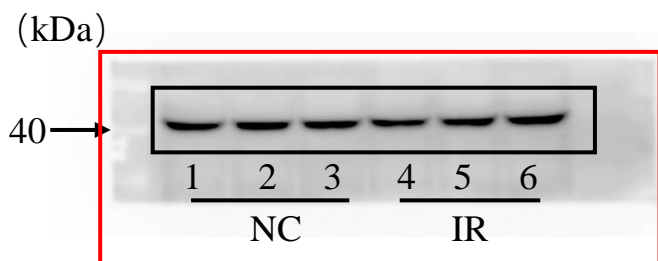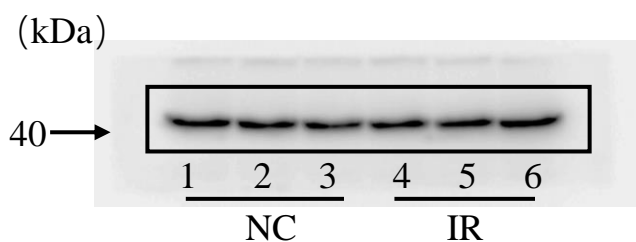

Figure 2E:

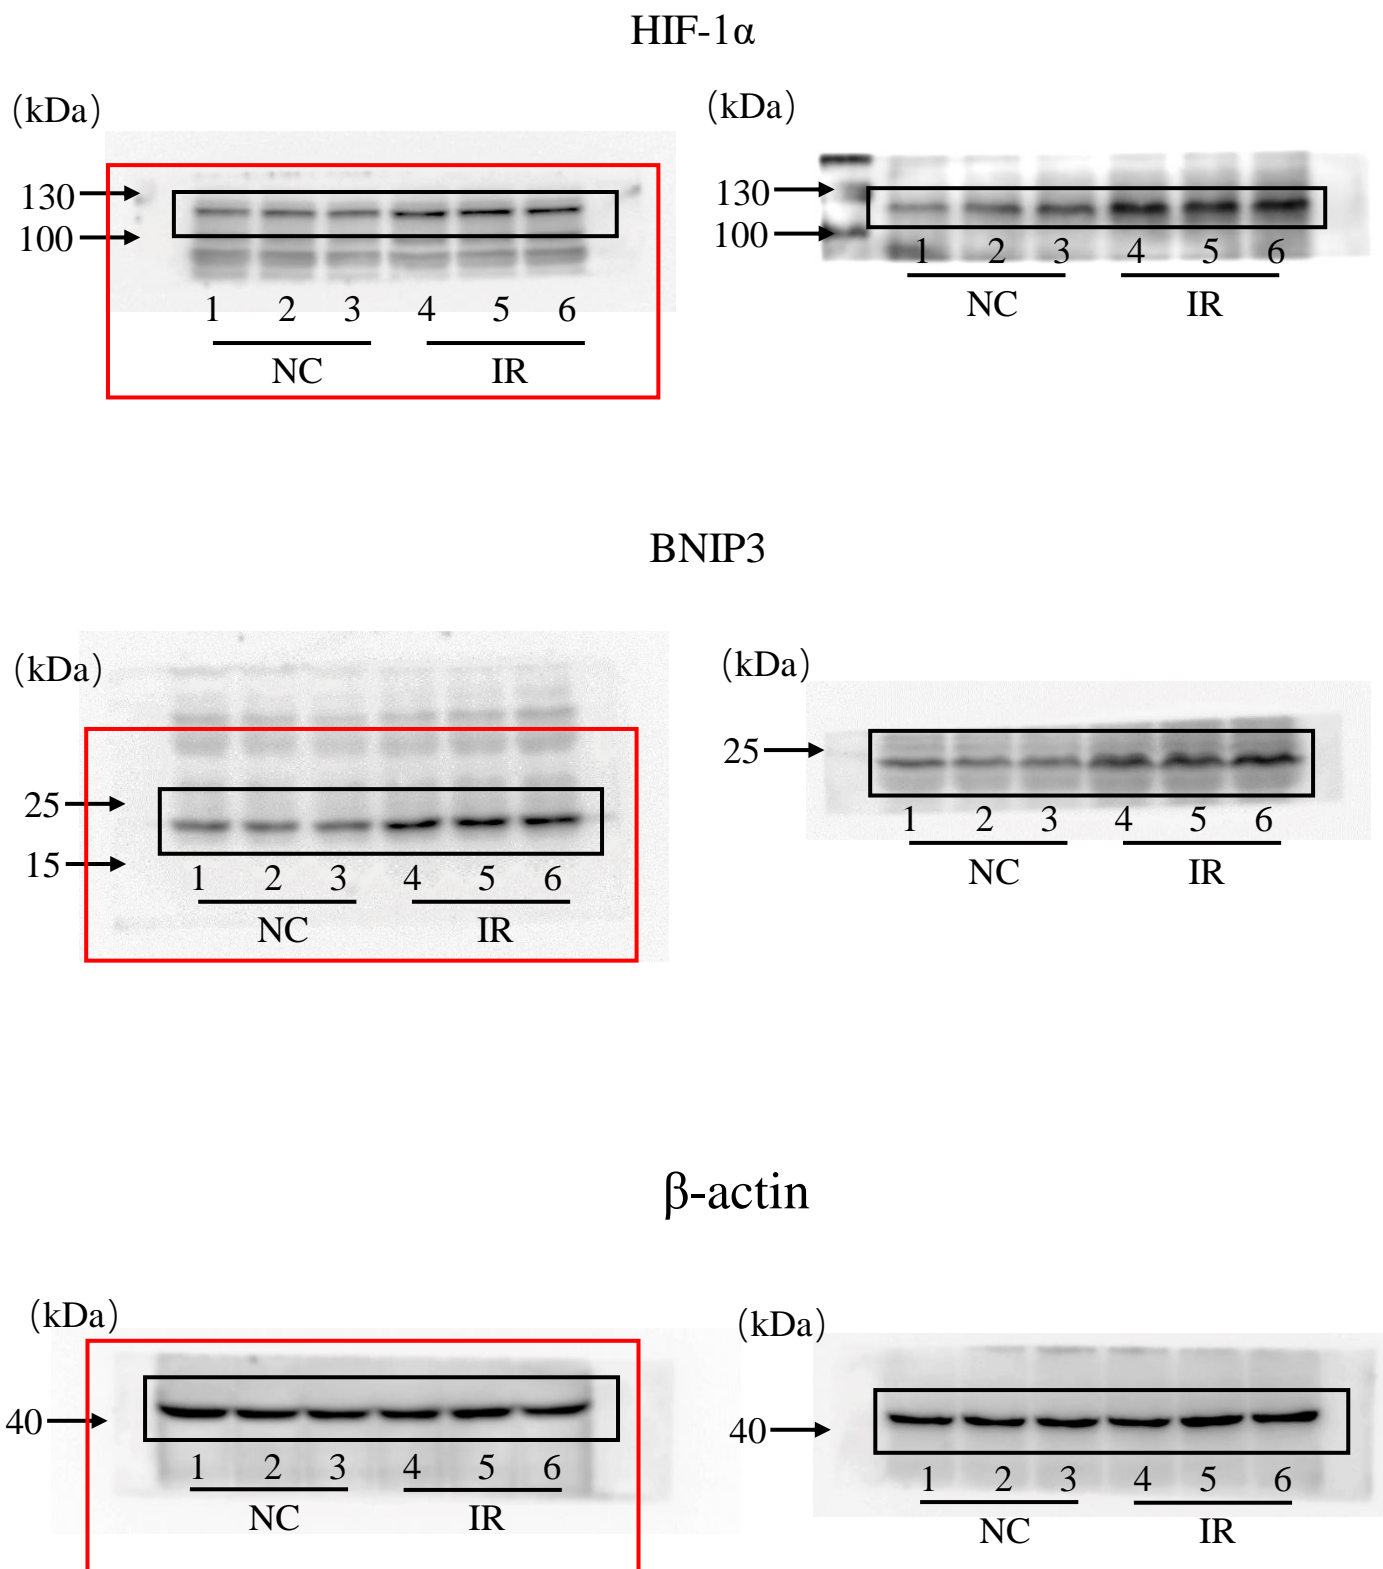

Figure 3F:

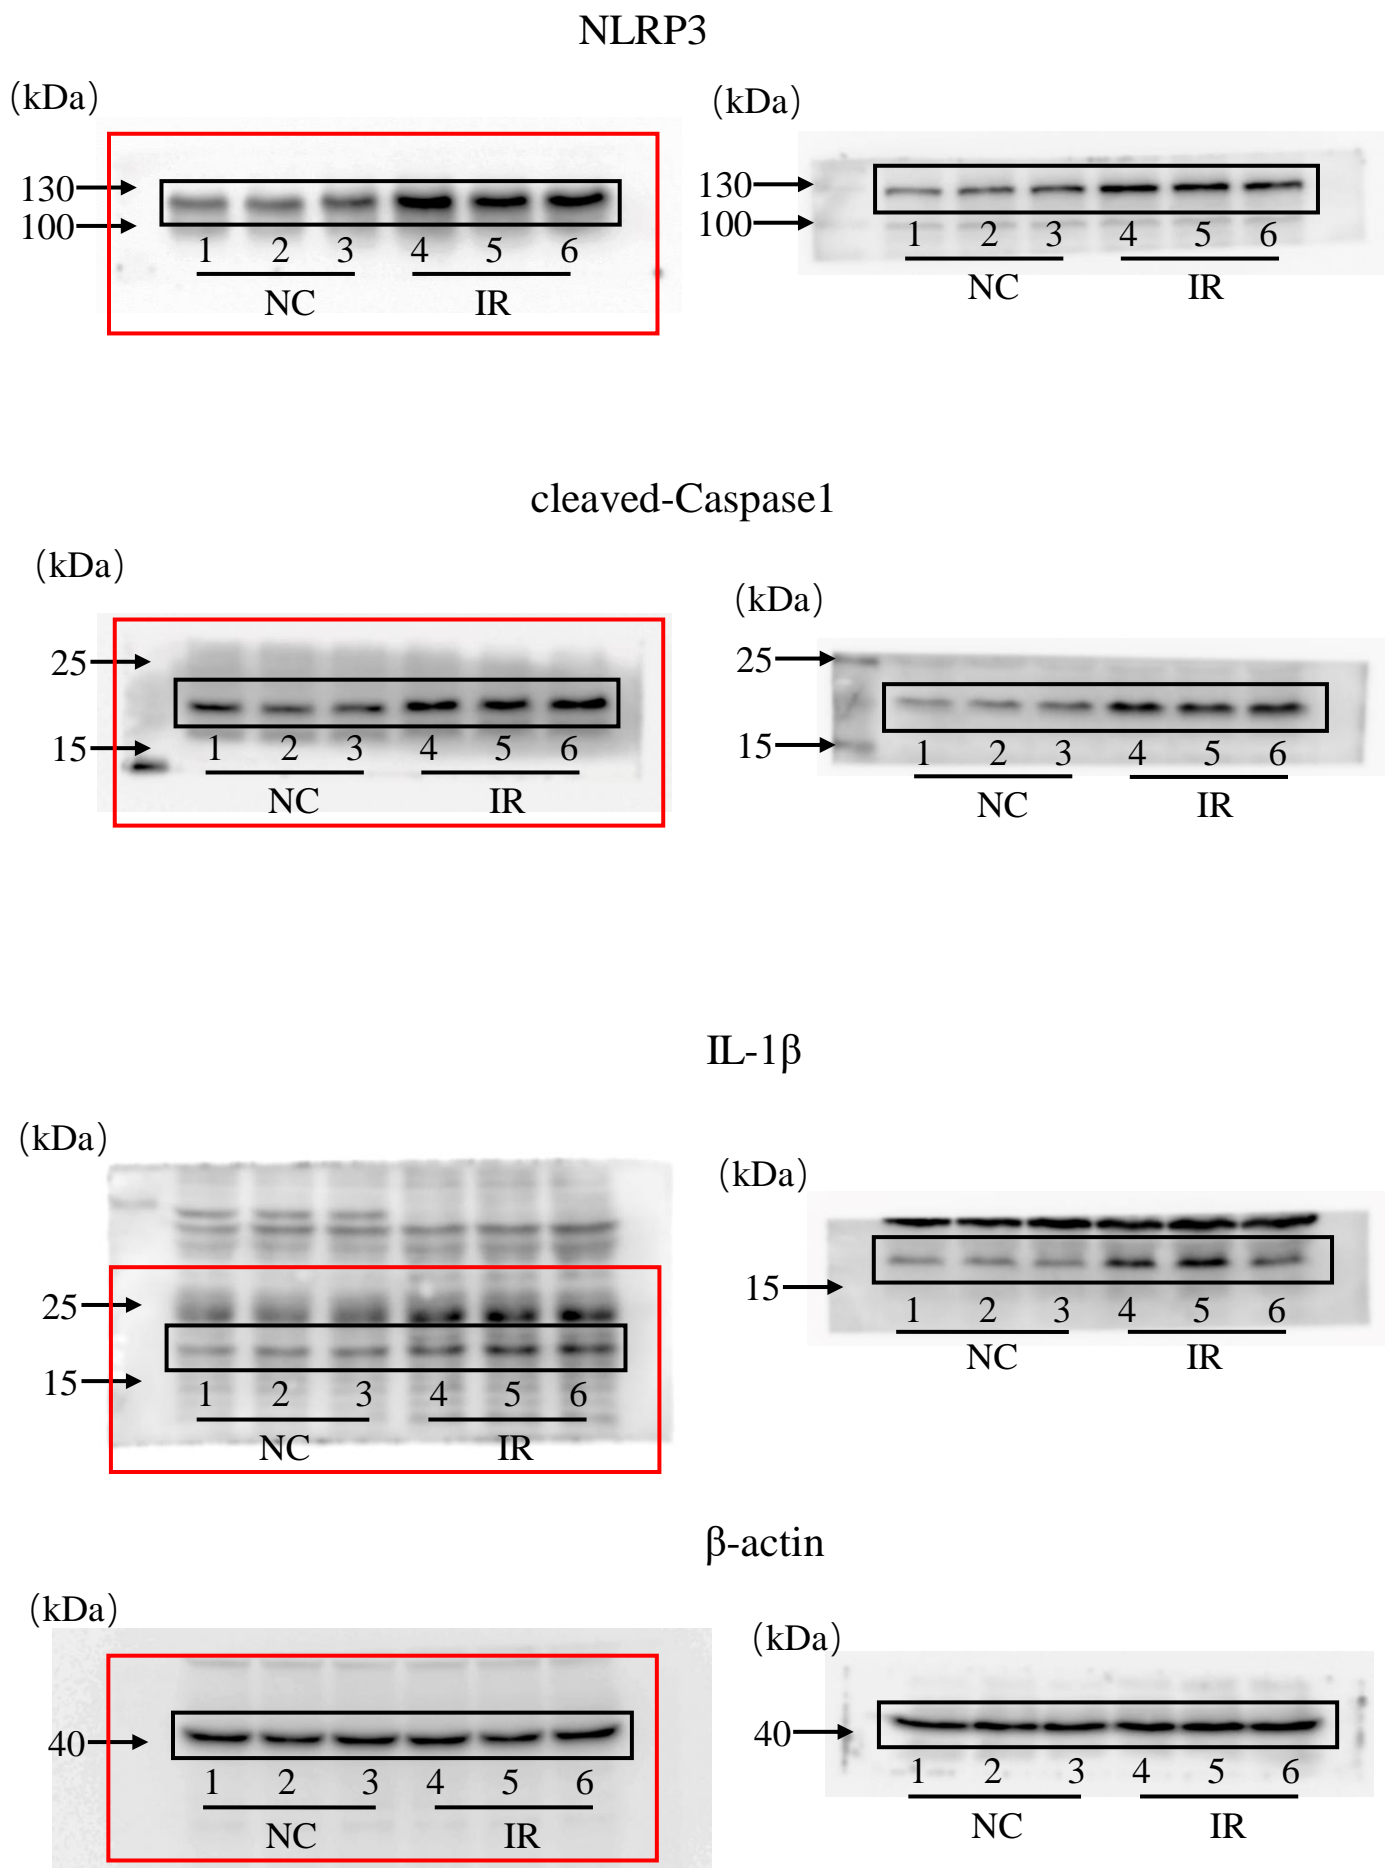

Figure 4B:

HIF-1 $\alpha$

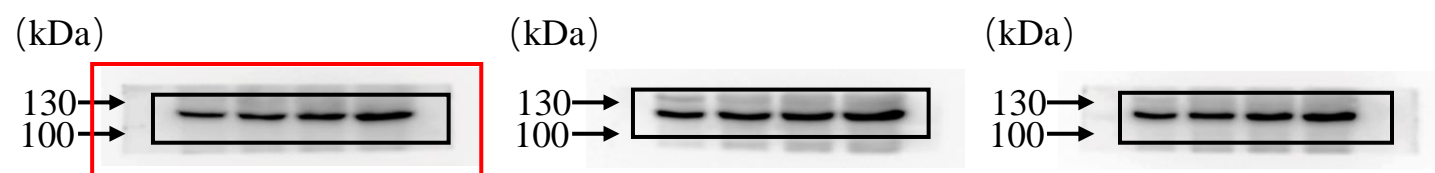

$\beta$ -actin

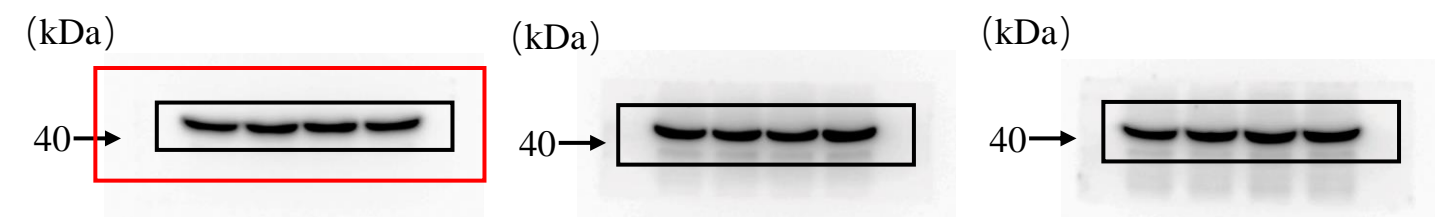

Figure 4E:

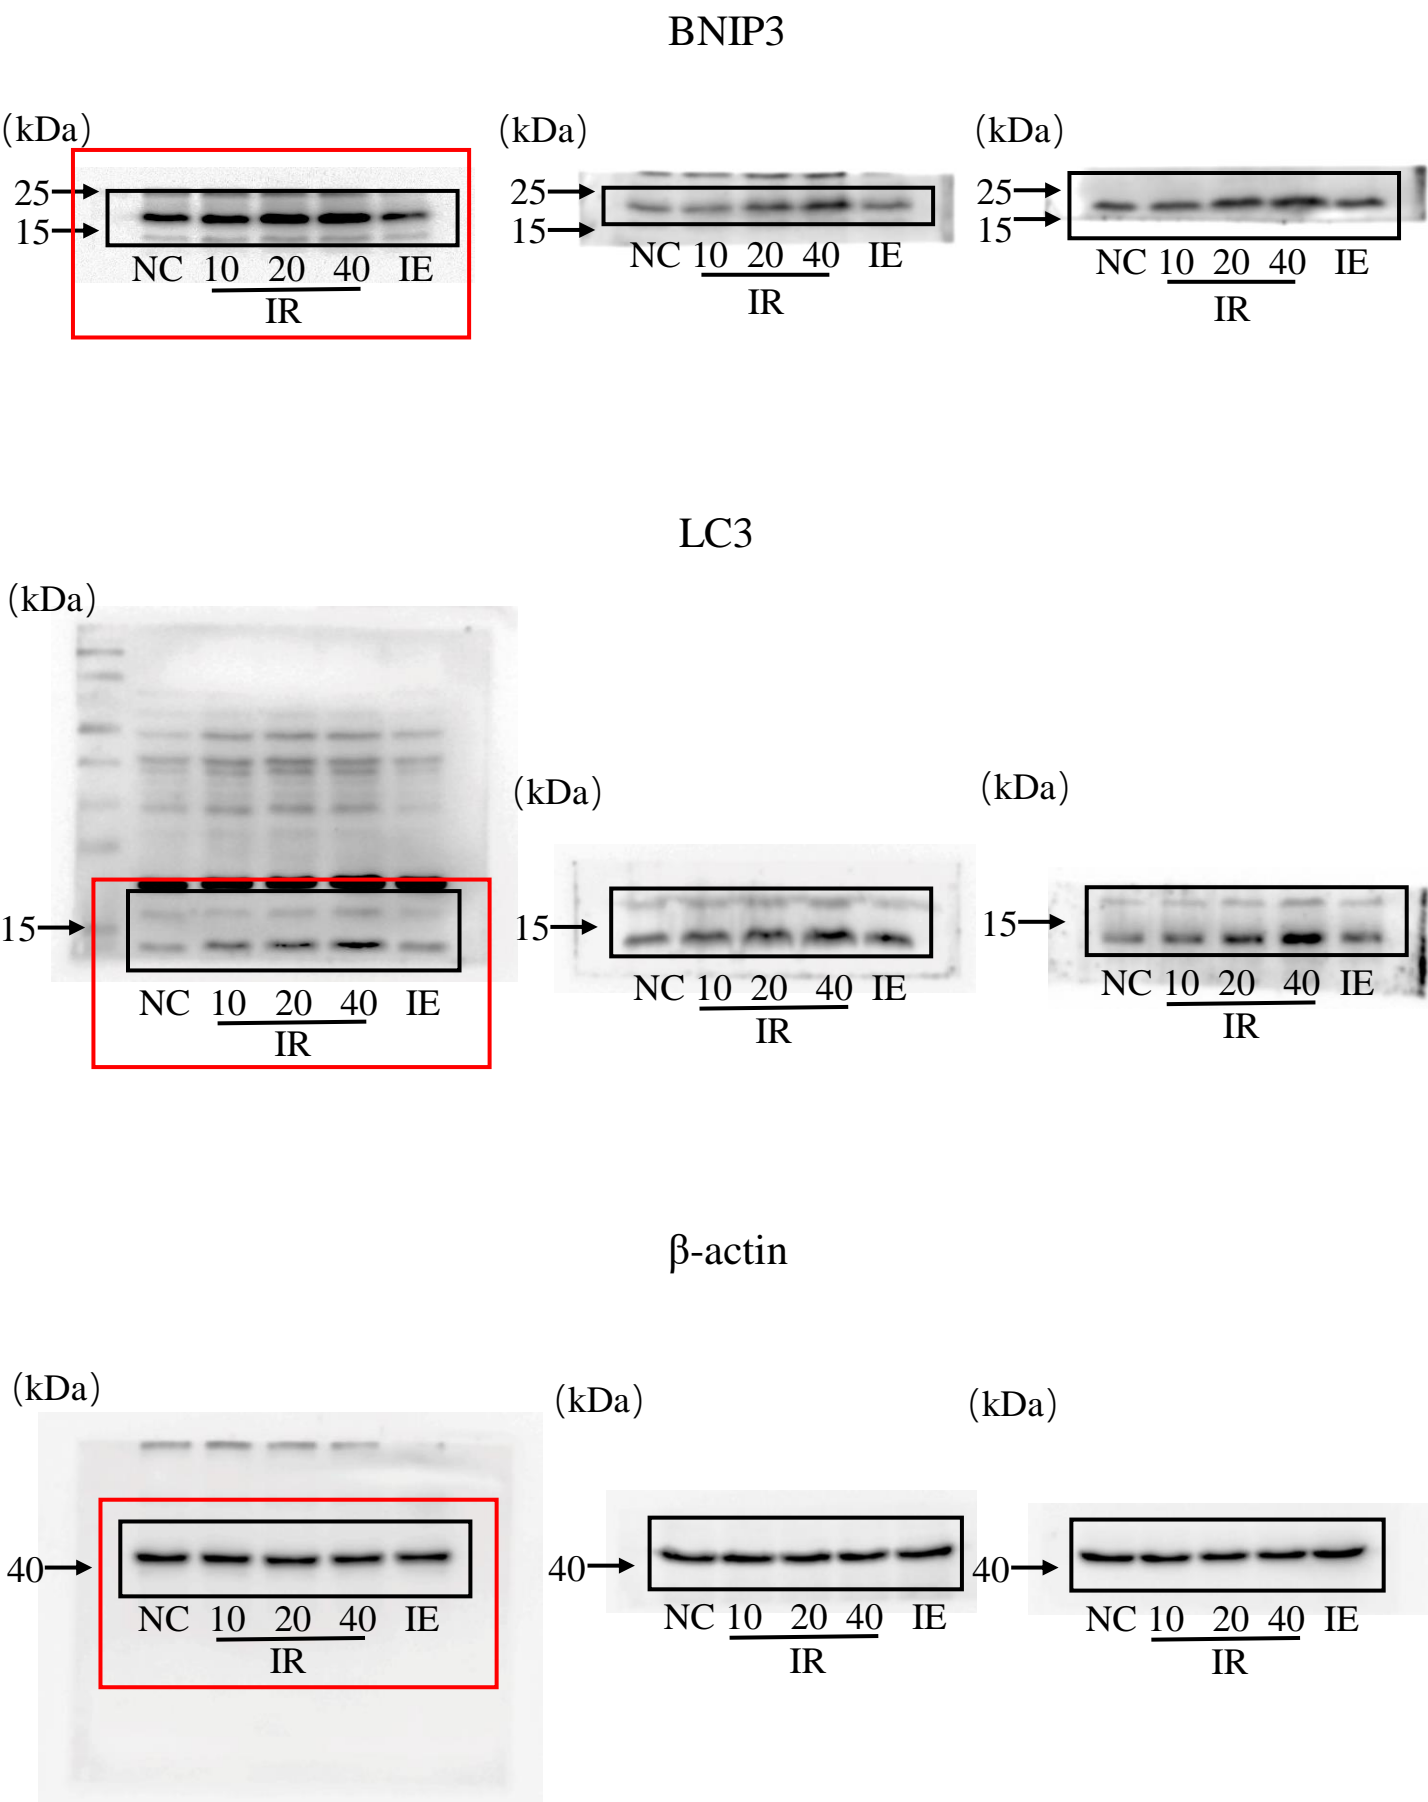

Figure 4E:

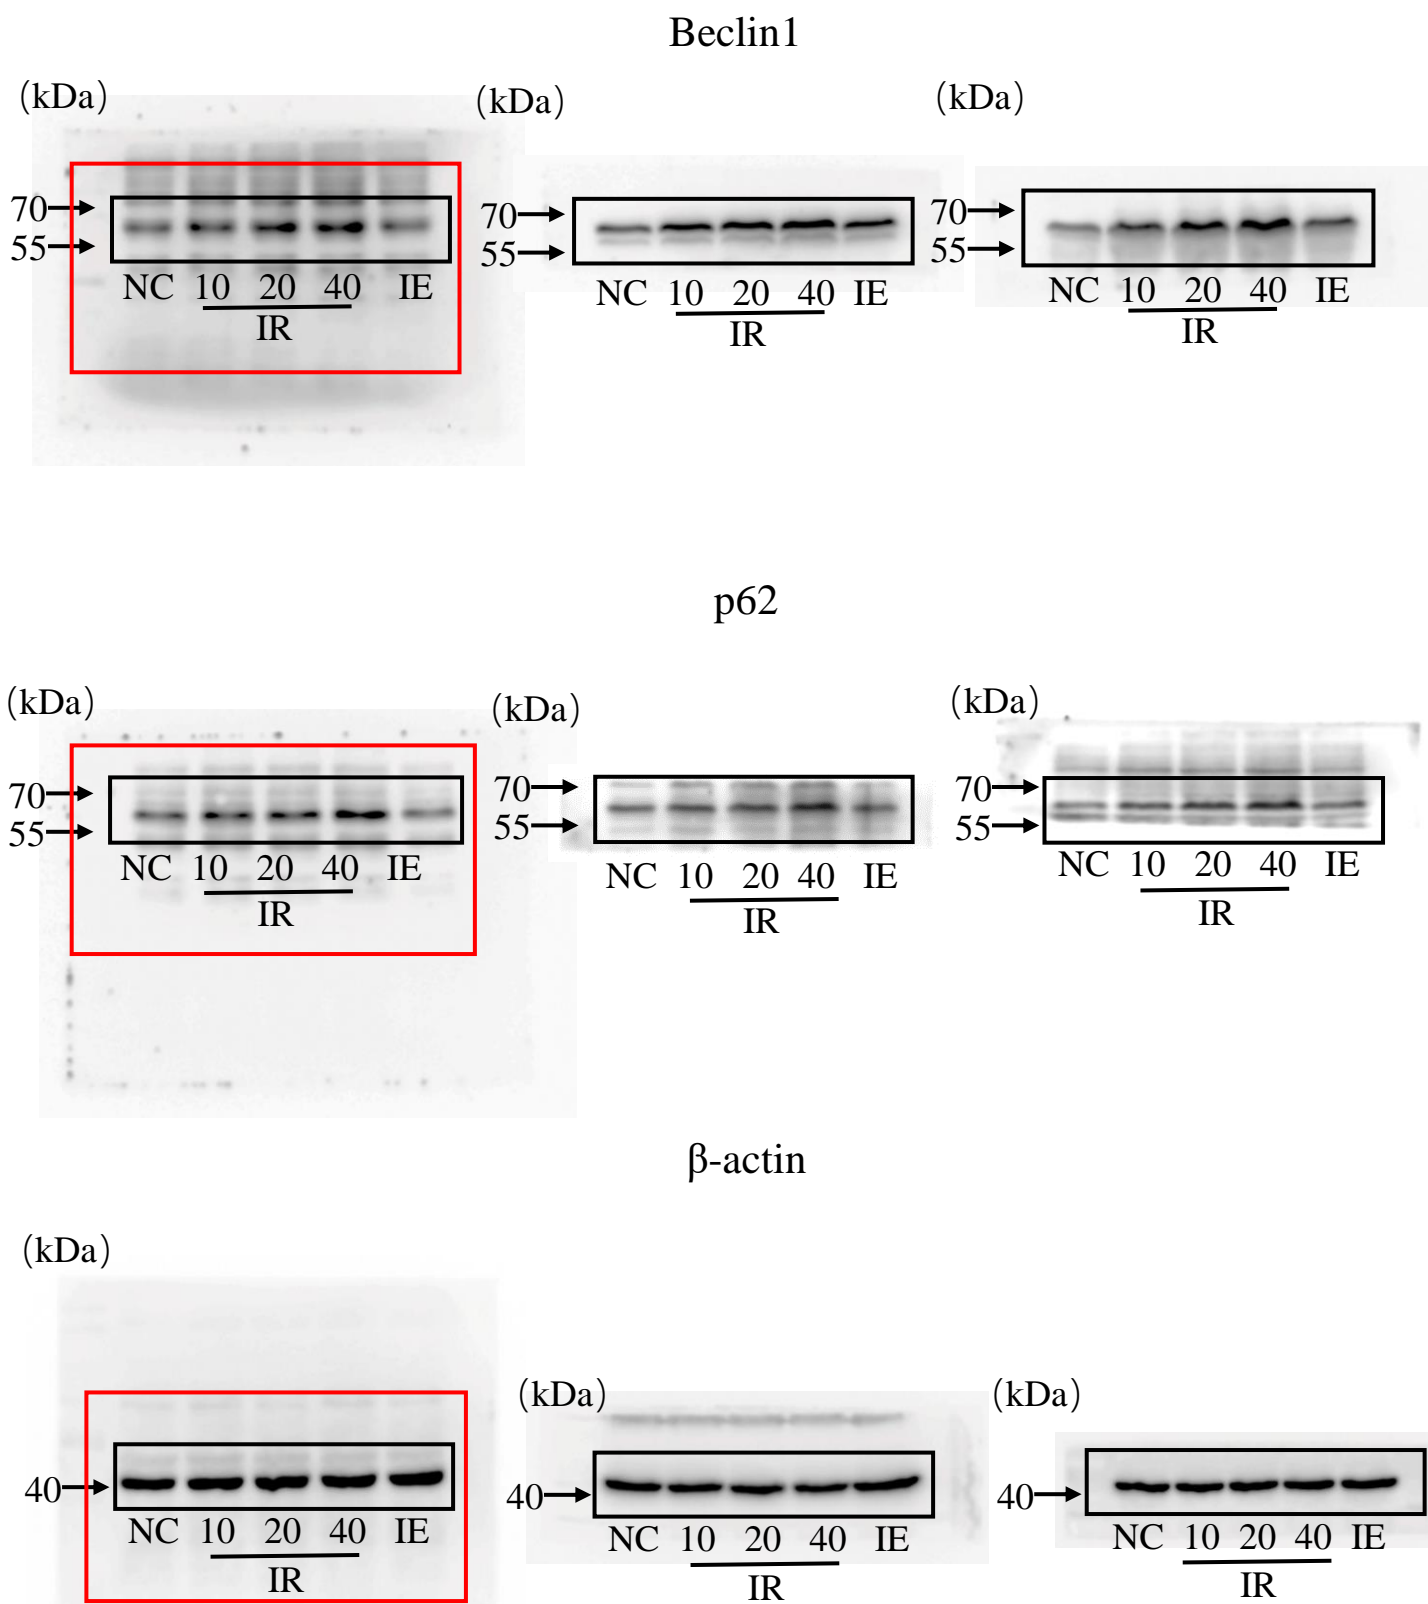

Figure 4H:

SREBP-1c

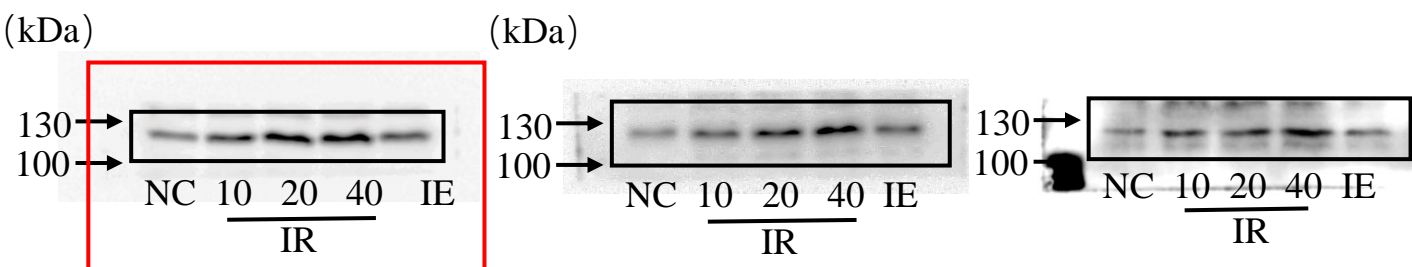

$\beta$ -actin

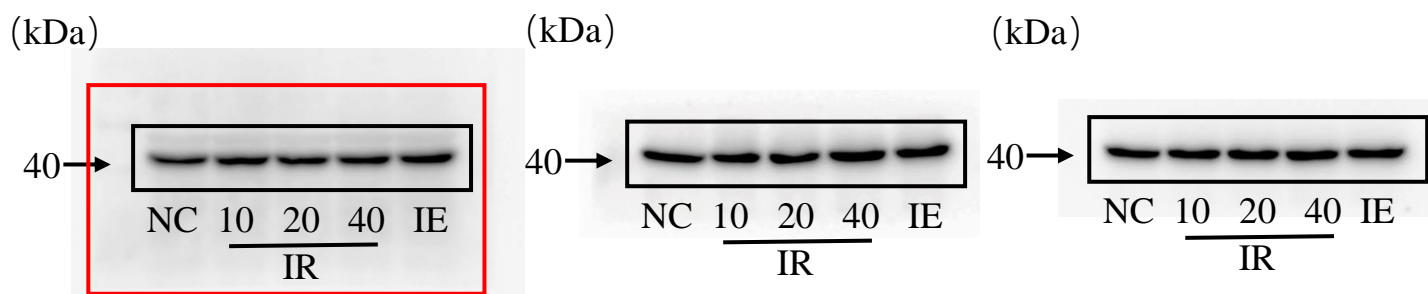



Figure 5A:

BNIP3

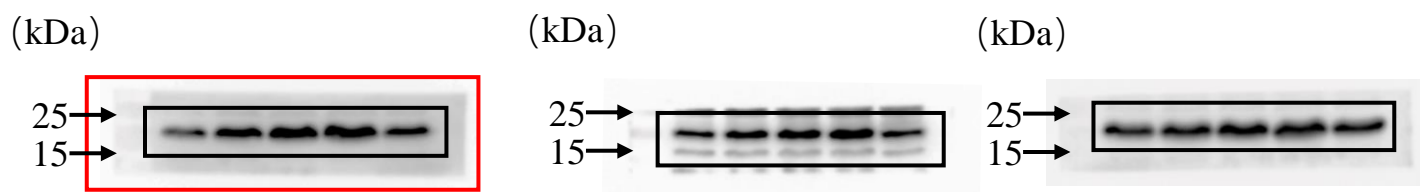

LC3

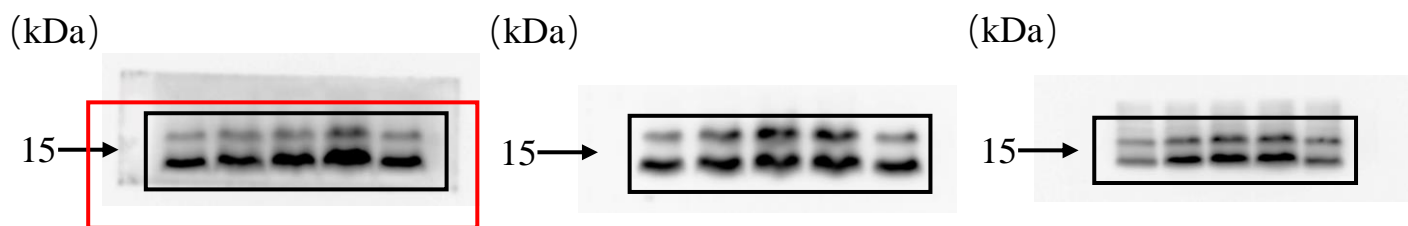

$\beta$ -actin

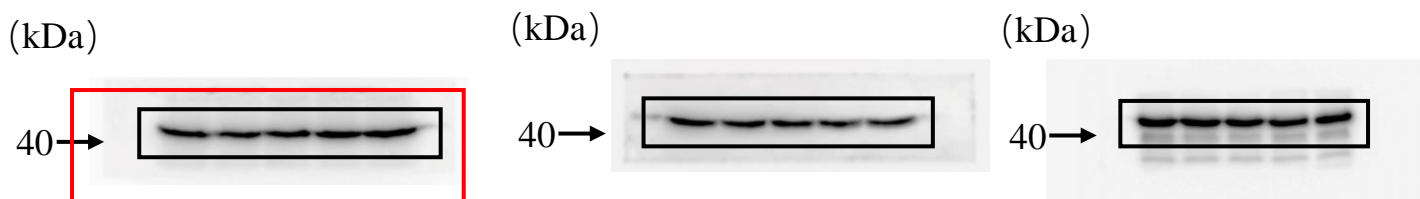

Figure 5A:

Beclin1

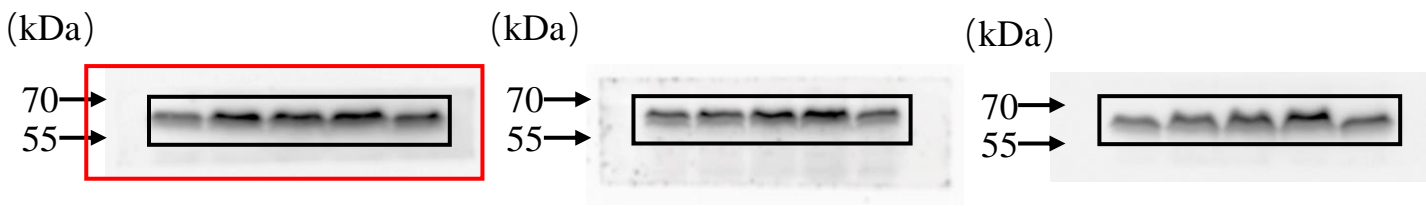

p62

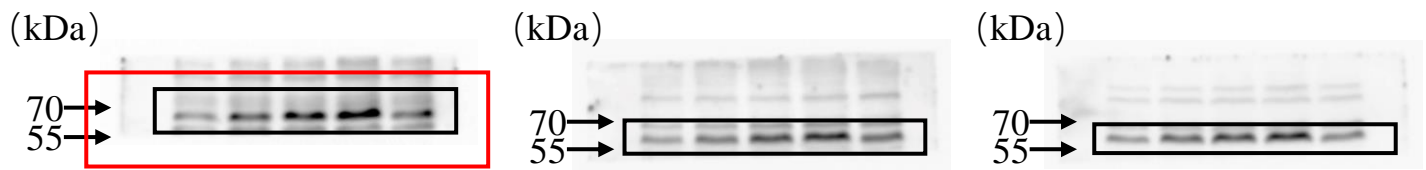

$\beta$ -actin

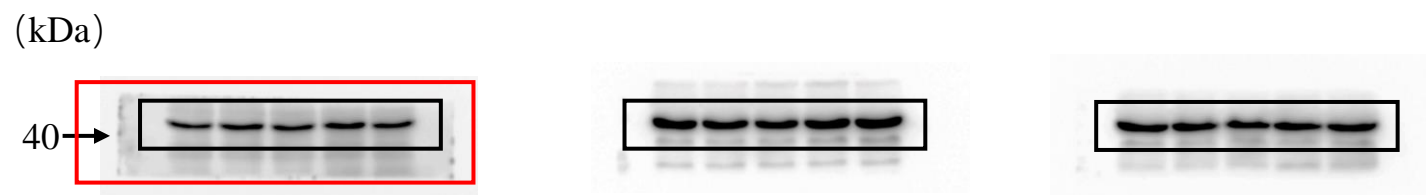

Figure 6A:

BNIP3

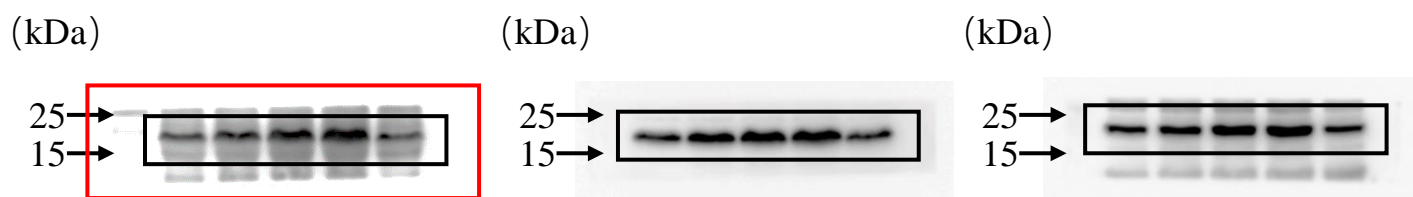

LC3

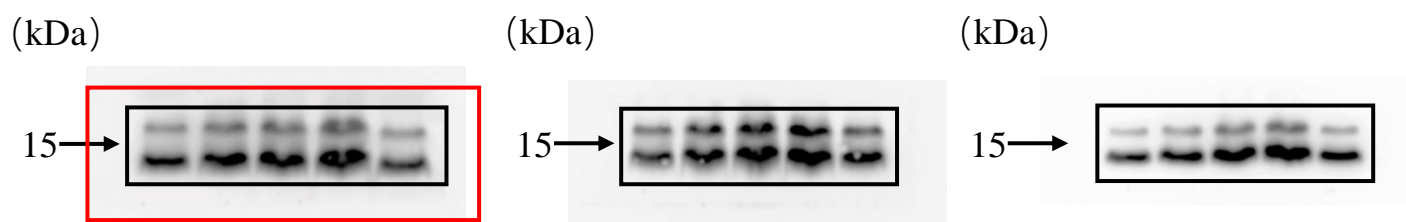

$\beta$ -actin

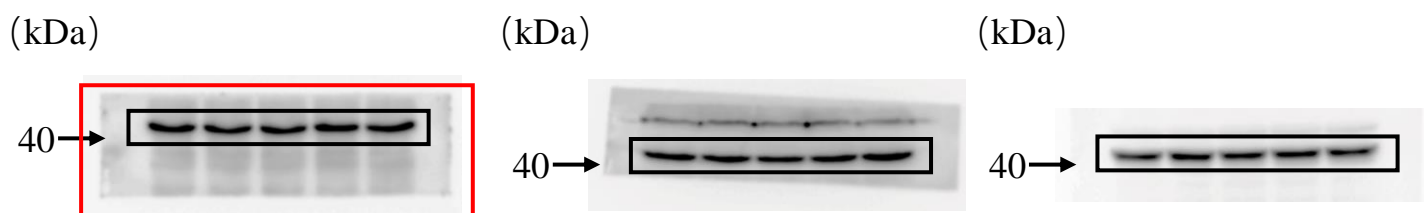

Figure 6A:

Beclin1

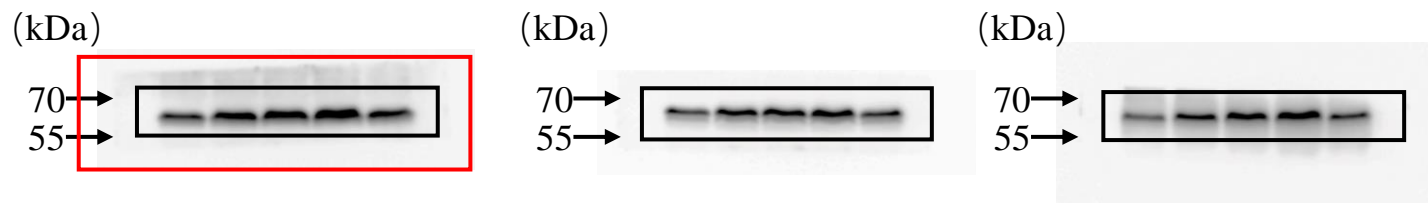

p62

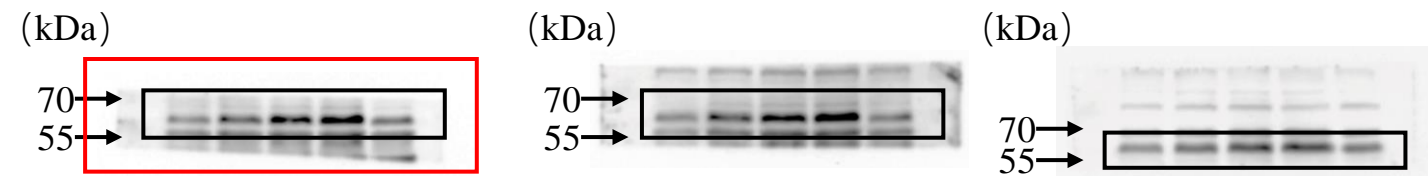

$\beta$ -actin

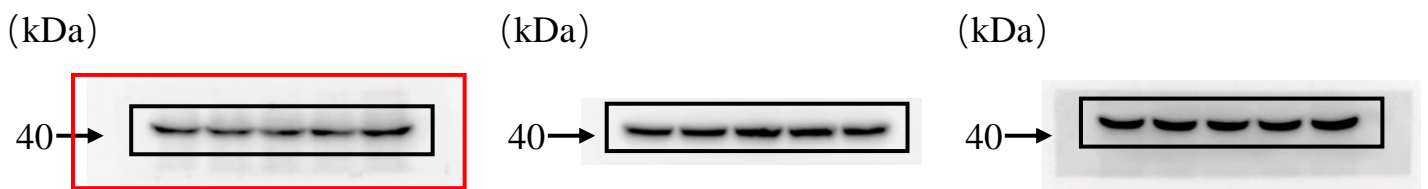

Figure 7A:

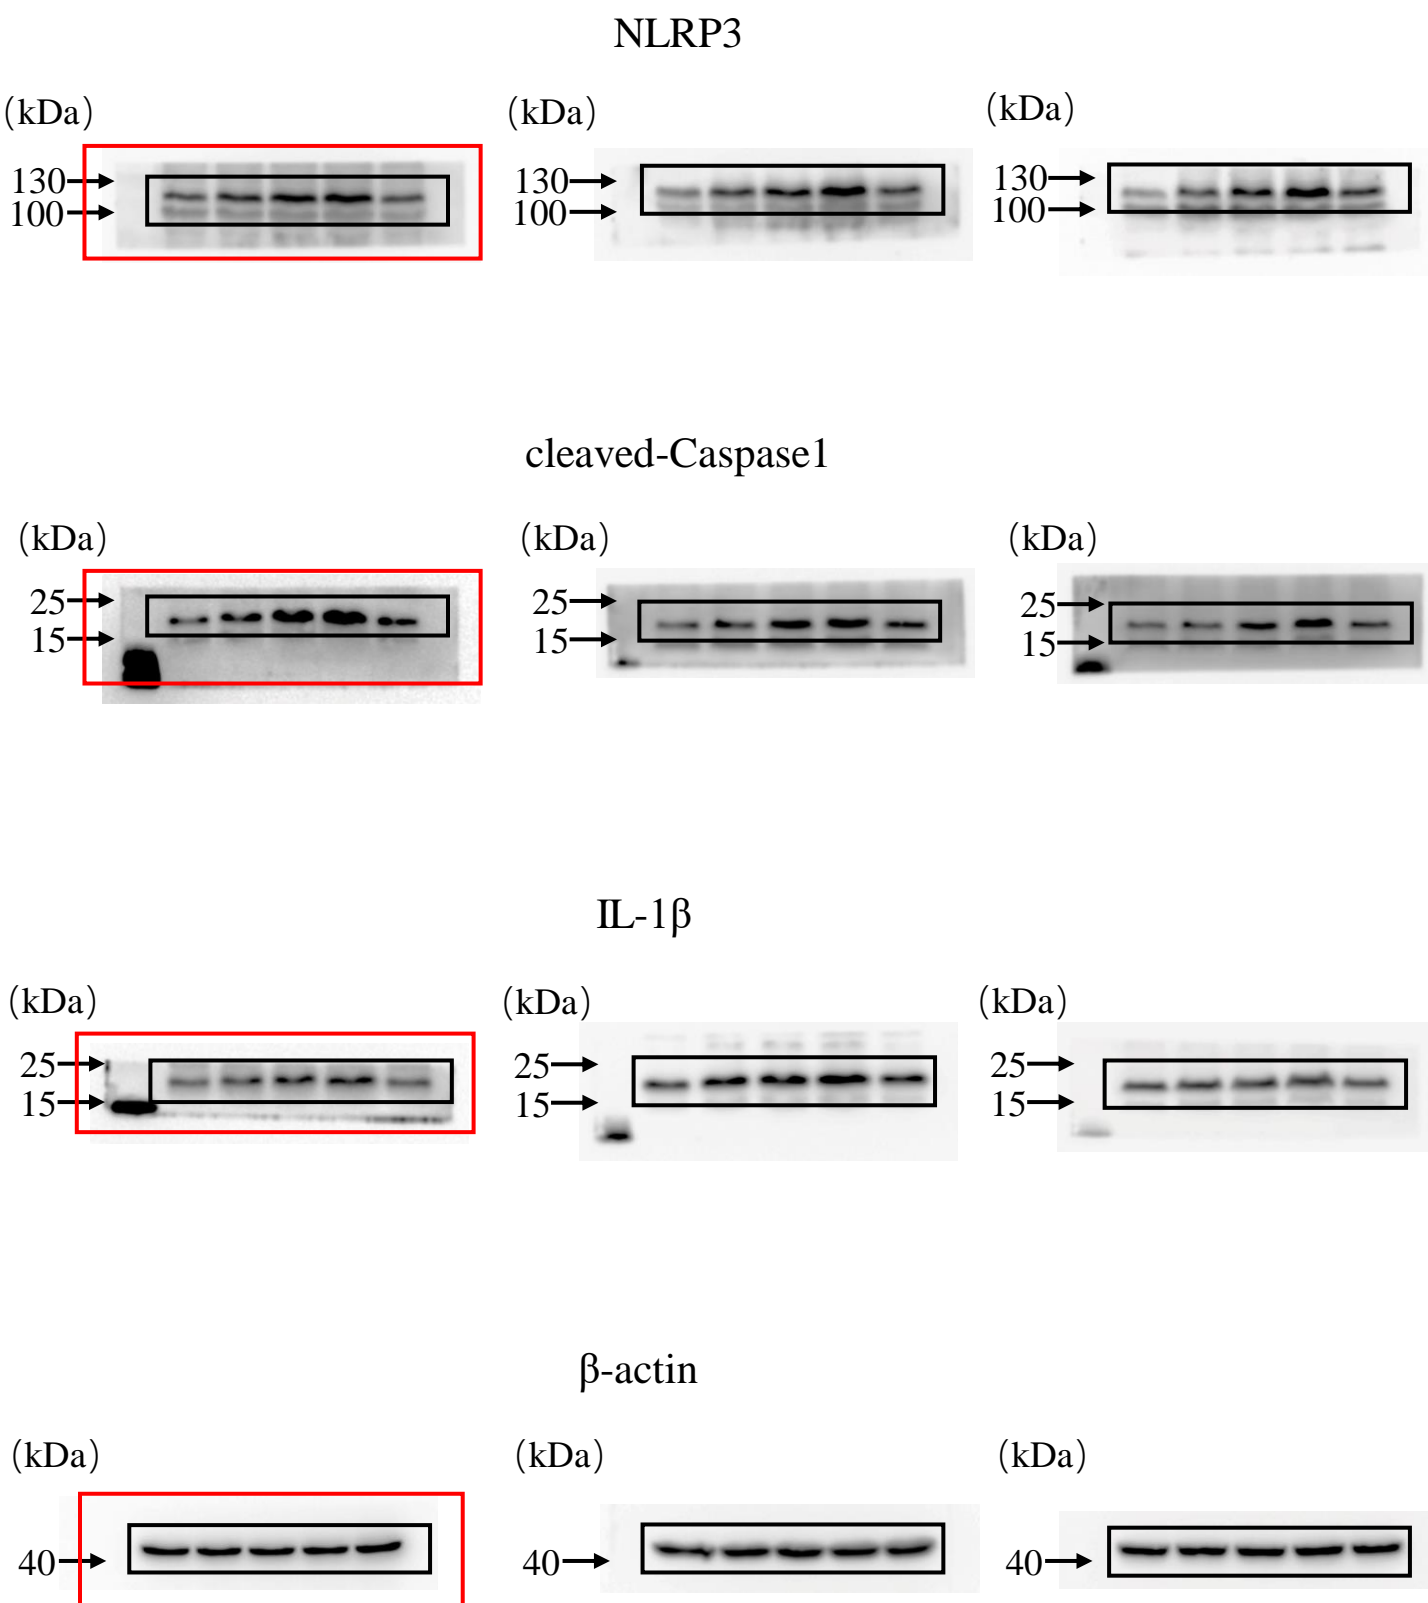

Figure 7D:

HIF-1 $\alpha$

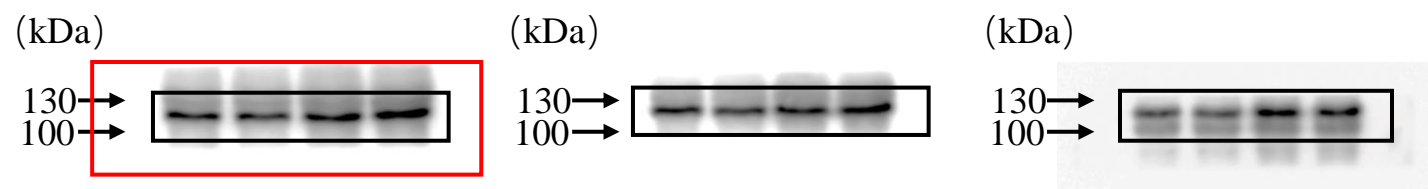

$\beta$ -actin

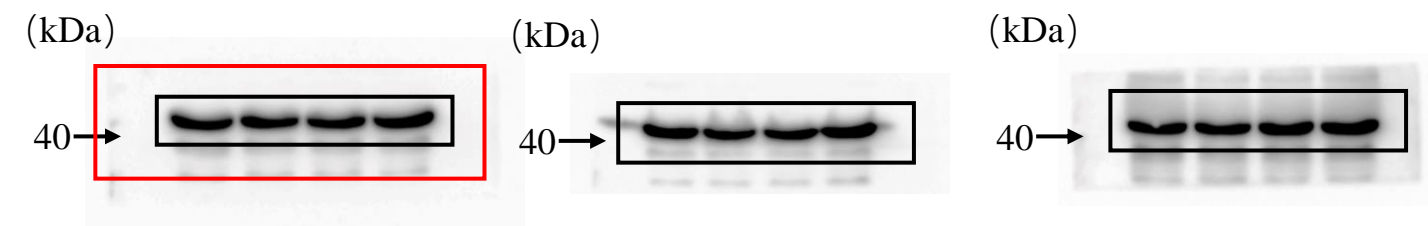

Figure 7D:

NLRP3

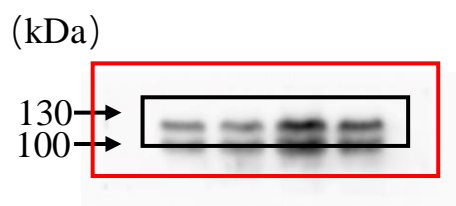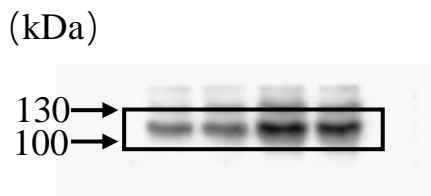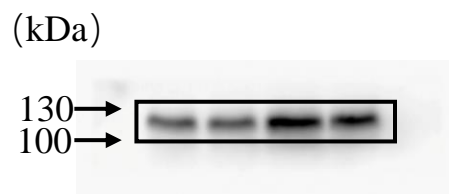

cleaved-Caspase1

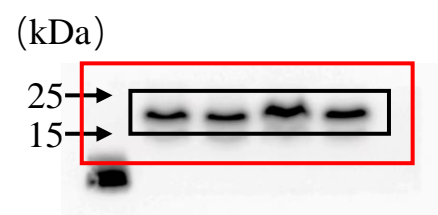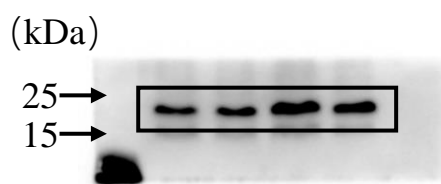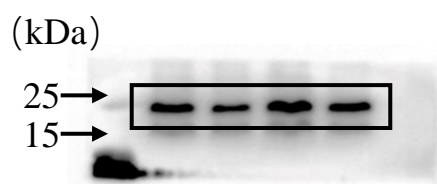

IL-1 $\beta$

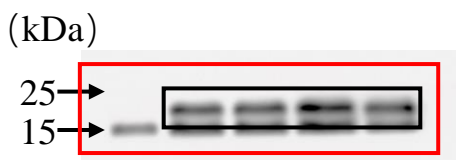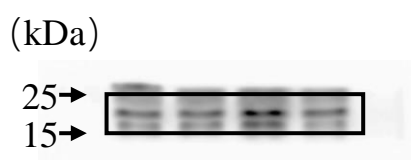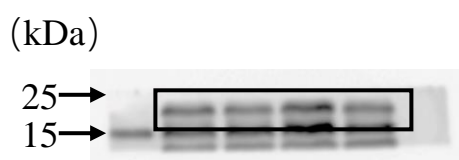

$\beta$ -actin

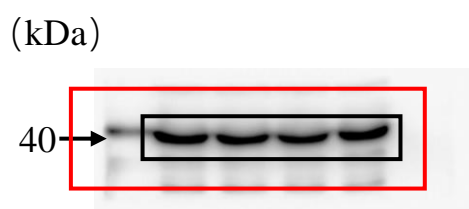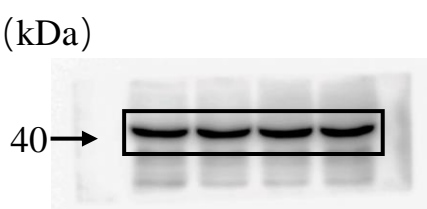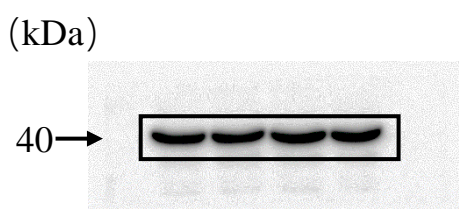

Figure S1:

HIF-1 $\alpha$

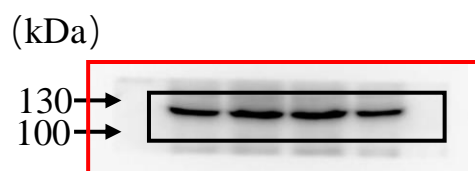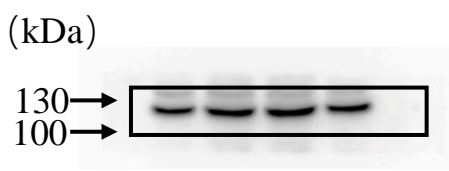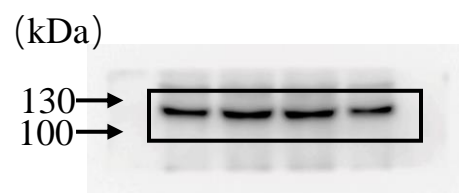

$\beta$ -actin

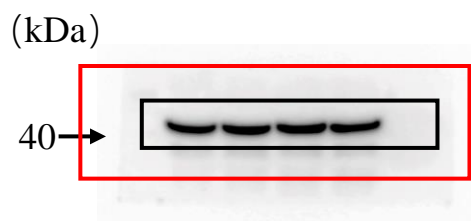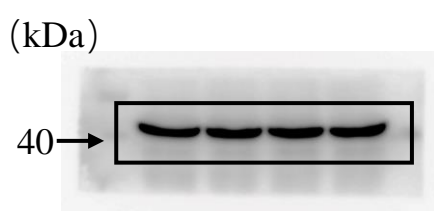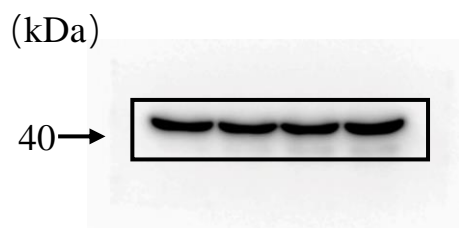

Supplement: 41598_2023_33848_MOESM2_ESM.pdf [file 41598_2023_33848_MOESM2_ESM.pdf]
