# Supplementary material for: Contribution of HIF-1α/BNIP3-mediated autophagy to lipid accumulation during irinotecan-induced liver injury
Source: PubMed Central journal article supplement (PMC10121580; doi:10.1038/s41598-023-33848-y), 2023-04-21
Supplement: 41598_2023_33848_MOESM1_ESM.pdf [file 41598_2023_33848_MOESM1_ESM.pdf]

# Figure S1:

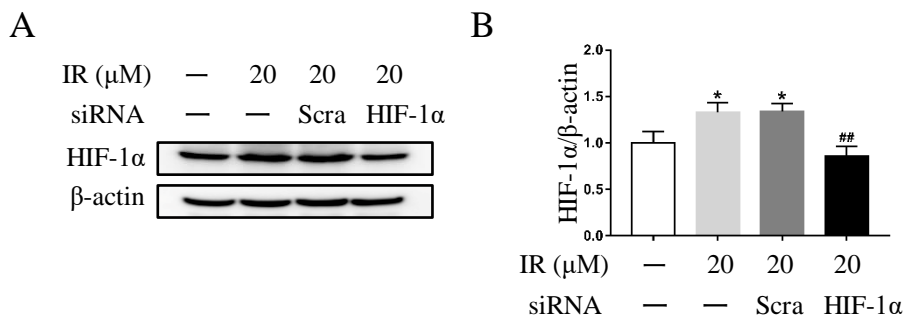

**Figure S1. HIF-1 $\alpha$  siRNA decreases the protein level of HIF-1 $\alpha$  in irinotecan (IR)-treat HepG2 cells.** (A) Western blot analysis of HIF-1 $\alpha$  protein level in HepG2 cells. (B) Densitometric quantification of HIF-1 $\alpha$ . The blots were cut prior to hybridisation with indicated primary antibodies. Data are presented as mean  $\pm$  SD (n = 3), \*P < 0.05 compared with normal control group, \*\*P < 0.01 compared with Scra group. Scra: scrambled.

# Table S1:

Table S1. Antibody information for western blot.

| <b>Antibody Name</b> | <b>Company and City</b>                   | <b>Dilution Degree</b> |
|----------------------|-------------------------------------------|------------------------|
| HIF-1 $\alpha$       | Gene Tex, Irvine, CA, USA                 | 1:2000                 |
| NLRP3                | Affinity Biosciences, Cincinnati, OH, USA | 1:1000                 |
| LC-3I/II             | Abcam, Cambridge, MA, USA                 | 1:1000                 |
| p62                  | Abcam, Cambridge, MA, USA                 | 1:1000                 |
| BNIP3                | Bioss, Beijing, China                     | 1:1000                 |
| SREBP-1c             | Bioss, Beijing, China                     | 1:1000                 |
| IL-1 $\beta$         | Protein Tech Group, Wuhan, China          | 1:1000                 |
| Beclin1              | Protein Tech Group, Wuhan, China          | 1:5000                 |
| cleaved<br>Caspase-1 | Protein Tech Group, Wuhan, China          | 1:1000                 |
| $\beta$ -actin       | Protein Tech Group, Wuhan, China          | 1:5000                 |
| anti-Mouse IgG       | Beyotime, Haimen, China                   | 1:1000                 |
| anti-Rabbit IgG      | Beyotime, Haimen, China                   | 1:1000                 |
